# Supplementary material for: Tuning phase transitions of aqueous protein solutions by multivalent cations
Source: Royal Society of Chemistry journal article supplement (doi:10.1039/c8cp05884a), 2018-01-01
Supplement: c8cp05884a1.pdf [file c8cp05884a1.pdf]

Cite this: DOI: 10.1039/xxxxxxxxxxx

## Supplementary Information for: Tuning phase transitions of aqueous protein solutions by multivalent cations<sup>†</sup>

Olga Matsarskaia,<sup>a</sup> Felix Roosen-Runge,<sup>b</sup> Gudrun Lotze,<sup>c</sup> Johannes Möller,<sup>c</sup> Alessandro Mariani,<sup>c</sup> Fajun Zhang,<sup>a</sup> and Frank Schreiber<sup>a\*</sup>

### 1 Calculation of effective protein surface charge, $Q(e)$ , from $\zeta$ potentials

From the  $\zeta$  potential data obtained from the measurements, the effective protein charge  $Q$  was calculated as follows.

First, the Debye screening length,  $\kappa^{-2}$  was calculated as<sup>1</sup>

$$\kappa^2 = 4\pi\lambda_B N_A \sum_i n_i Z_i^2 \quad (1)$$

with the Bjerrum length  $\lambda_B$ <sup>2</sup>

$$\lambda_B = \frac{e^2}{4\pi\epsilon_0\epsilon_{H_2O}k_B T} \quad (2)$$

with  $e$  being the elementary charge,  $\epsilon_0$  the vacuum dielectric permittivity and  $\epsilon_{H_2O}$  the total dielectric permittivity of water at the respective temperature<sup>3</sup>.

The Henry equation relates the electrophoretic mobility  $\mu$  of a colloidal particle with a spherical shape, a radius  $a$  and a zeta potential  $\zeta$  in a medium with a viscosity  $\eta$  via<sup>4,5</sup>

$$\mu = \frac{2}{3} \frac{\epsilon_r \epsilon_0}{\eta} \zeta f(\kappa a) \quad (3)$$

Here, the Henry function  $f(\kappa a)$  as given by Ohshima<sup>5</sup>

$$f(\kappa a) = 1 + \frac{1}{2} \left[ 1 + \left( \frac{2.5}{\kappa a [1 + 2 \exp(-\kappa a)]} \right) \right]^{-3} \quad (4)$$

is used to relate the electrophoretic mobility. The  $\zeta$  potential is then calculated with the BSA radius  $a=3.3$  nm. The default Zetasizer setting uses a Henry function  $f(\kappa a) = 1.5$ , which does not consider effects specific to the systems investigated here. Therefore, corrected  $\zeta$  values  $\zeta_{corr}$  are obtained by multiplying each  $\zeta$  potential value by its corresponding  $f(\kappa a)$  value. The  $\zeta_{corr}$  values are furthermore rescaled by multiplying them by  $e/k_B T$ . The rescaled values are referred to as  $\zeta^*$ .

The protein surface charge density,  $\sigma$  ( $C/m^2$ ), is given by<sup>6</sup>

$$\sigma = \frac{\epsilon_0 \epsilon_r \kappa k_B T}{e} (2 \sinh(\zeta^*/2) + (4/(\kappa a) \tanh(\zeta^*/4))) \quad (5)$$

Finally, the surface charge  $Q$  of BSA under the respective sample conditions given by salt concentration and temperature are calculated as

$$Q = 4\pi a^2 \sigma \quad (6)$$

### 2 Fitting model for $Q(e)$ as a function of temperature and salt concentration

We begin with a standard Langmuir-like equation describing the binding of cations to the protein surface:

$$Q = Q_0 + \frac{Nvc}{c+K} \quad (7)$$

which can be converted into its alternative form

$$Nvc + K(Q_0 - Q) + c(Q_0 - Q) = 0 \quad (8)$$

Here,  $Q_0$  is the initial protein surface charge in the absence of salt,  $N$  is the number of binding sites,  $v$  the valence of the salt (here, it is always +3),  $K$  the binding constant and  $c$  the salt concentration.

Next, we define the point of zero charge:

$$Q(c_0) = 0 \quad (9)$$

and the charge at  $c_s = c_1 = 1$  mM (plateau value) as

$$Q(c_1) = Q_1 \quad (10)$$

Substituting expressions 9 and 10 into Eqn. 8, we obtain a system of linear equations:

$$Nvc_0 + KQ_0 + cQ_0 = 0 \quad (11)$$

$$Nvc_1 + K(Q_0 - Q_1) + c_1(Q_0 - Q_1) = 0 \quad (12)$$

which allows us to express  $N$  and  $K$  from Eqn. (7) as

<sup>a</sup> Institut für Angewandte Physik, Universität Tübingen, Auf der Morgenstelle 10, 72076 Tübingen, Germany. Fax: +49 (0)7071 295110; Tel: +49 (0)7071 2978663; E-mail: frank.schreiber@uni-tuebingen.de

<sup>b</sup> Division of Physical Chemistry, Lund University, Lund, Sweden

<sup>c</sup> ESRE, Grenoble, France

$$\begin{pmatrix} vc_0 & Q_0 \\ vc_1 & Q_0 - Q_1 \end{pmatrix} \begin{pmatrix} N \\ K \end{pmatrix} = \begin{pmatrix} -c_0 Q_0 \\ -c_1(Q_0 - Q_1) \end{pmatrix} \quad (13)$$

Solving this system of equations yields the following expressions for  $K$  and  $N$ :

$$N = \frac{1}{v} \frac{Q_0(Q_0 - Q_1)(c_1 - c_0)}{c_0(Q_0 - Q_1) - c_1 Q_0} \quad (14)$$

$$K = \frac{c_0 c_1 Q_1}{c_0(Q_0 - Q_1) - c_1 Q_0} \quad (15)$$

and, finally, the equation used to fit the temperature- and salt concentration-dependent  $Q$  values:

$$Q = Q_0 \left( 1 + \frac{c(Q_0 - Q_1)(c_1 - c_0)}{c(c_0(Q_0 - Q_1) - c_1 Q_0) + c_0 c_1 Q_1} \right) \quad (16)$$

## References

- 1 A. Delgado, F. González-Caballero, R. Hunter, L. Koopal and J. Lyklema, *J. Colloid Interface Sci.*, 2007, **309**, 194–224.
- 2 J. Israelachvili, *Intermolecular and Surface Forces.*, Academic Press, London, 1991.
- 3 B. B. Owen, R. C. Miller, C. E. Milner and H. L. Cogan, *J. Phys. Chem.*, 1961, **65**, 2065–2070.
- 4 D. C. Henry, *Proceedings of the Royal Society A: Mathematical, Physical and Engineering Sciences*, 1931, **133**, 106–129.
- 5 H. Ohshima, *J. Colloid Interface Sci.*, 1994, **168**, 269–271.
- 6 H. Ohshima, T. W. Healy and L. R. White, *J. Colloid Interface Sci.*, 1982, **90**, 17–26.
